# Supplementary material for: Is There Evidence for Intelligence-by-Conscientiousness Interaction in the Prediction of Change in School Grades from Age 11 to 15 Years?
Source: MDPI journal article supplement (doi:10.3390/jintelligence11030045), 2023-02-25
Supplement: s1 [file s1]

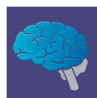

**Table S1**

*Distribution of school types in the current sample*

| School type                              | Measurement time |                |                |
|------------------------------------------|------------------|----------------|----------------|
|                                          | t <sub>1</sub>   | t <sub>2</sub> | t <sub>3</sub> |
| Elementary school                        | 46.7             | 3.3            | 0.2            |
| Lower secondary school                   | 0.5              | 0.8            | 1.2            |
| Intermediate secondary school            | 5.8              | 11.3           | 11.8           |
| Integrated lower and intermediate school | 3.6              | 5.0            | 6.1            |
| Comprehensive school                     | 10.7             | 24.0           | 20.6           |
| Waldorf school                           | 1.4              | 1.5            | 1.7            |
| Upper secondary school                   | 27.5             | 51.7           | 54.8           |
| School for special needs                 | 1.4              | 1.7            | 2.4            |
| Other type of school                     | 2.4              | 0.8            | 1.2            |

*Note.* Percentages are depicted.

**Table S2***Results of Latent Change Models for Grades (Math)*

| Parameters                           | Est.                  | [95% CI]      | <i>p</i> |
|--------------------------------------|-----------------------|---------------|----------|
| Latent means                         |                       |               |          |
| $\mu_{\text{Baseline}}$              | -.004                 | [-.075; .067] | .911     |
| $\mu_{\text{Change}}$                | -.037                 | [-.088; .014] | .154     |
| Variances                            |                       |               |          |
| $\sigma^2_{\text{Baseline}}$         | .478                  | [.366; .590]  | <.001    |
| $\sigma^2_{\text{Change}}$           | .057                  | [-.001; .114] | .054     |
| Covariances                          |                       |               |          |
| $\sigma^2_{\text{Baseline, Change}}$ | -.019                 | [-.088; .014] | .563     |
| Model fit                            |                       |               |          |
| $\chi^2(\text{df})$                  | 1.148 (3), $p = .765$ |               |          |
| CFI                                  | >.999                 |               |          |
| RMSEA<br>[90% CI]                    | <.001 [.000, .041]    |               |          |
| SRMR                                 | .005                  |               |          |

*Note.* Unstandardized solution from the constant change model. Grades corrected for school type and inverted for better interpretability. Est. = estimate.

**Table S3***Results of Latent Change Models for Grades (German)*

| Parameters                           | Est.                   | [95% CI]      | <i>p</i> |
|--------------------------------------|------------------------|---------------|----------|
| Latent means                         |                        |               |          |
| $\mu_{\text{Baseline}}$              | .005                   | [-.075; .067] | .869     |
| $\mu_{\text{Change}}$                | -.031                  | [-.088; .014] | .198     |
| Variances                            |                        |               |          |
| $\sigma^2_{\text{Baseline}}$         | .365                   | [.366; .590]  | <.001    |
| $\sigma^2_{\text{Change}}$           | .052                   | [-.001; .114] | .040     |
| Covariances                          |                        |               |          |
| $\sigma^2_{\text{Baseline, Change}}$ | -.018                  | [-.088; .014] | .514     |
| Model fit                            |                        |               |          |
| $\chi^2(\text{df})$                  | 20.658 (3), $p = .765$ |               |          |
| CFI                                  | <.001                  |               |          |
| RMSEA<br>[90% CI]                    | <.001 [.000, .041]     |               |          |
| SRMR                                 | .060                   |               |          |

*Note.* Unstandardized solution from the constant change model. Grades corrected for school type and inverted for better interpretability. Est. = estimate.

**Table S4***Latent change models predicting baseline level and change of grades (math)*

|                                                                                                          | DV: Baseline |       | DV: Growth |      |
|----------------------------------------------------------------------------------------------------------|--------------|-------|------------|------|
|                                                                                                          | $\beta$      | $p$   | $\beta$    | $p$  |
| Conditional models without latent interaction                                                            |              |       |            |      |
| C                                                                                                        | .241         | <.001 | -.031      | .810 |
| Gf                                                                                                       | .606         | <.001 | -.095      | .501 |
| (Sex)                                                                                                    | -.050        | .290  | .094       | .366 |
| (SES)                                                                                                    | .114         | .070  | -.171      | .214 |
| $X^2(48) 76.868, p = .006; CFI = .981, RMSEA = .024; SRMR = .031$<br>$AIC = 35266.456; nBIC = 35464.451$ |              |       |            |      |
| Latent interaction model                                                                                 |              |       |            |      |
| C                                                                                                        | .246         | <.001 | -.047      | .717 |
| Gf                                                                                                       | .600         | <.001 | -.085      | .547 |
| C x Gf                                                                                                   | -.104        | .043  | .227       | .098 |
| (Sex)                                                                                                    | -.047        | .321  | .086       | .409 |
| (SES)                                                                                                    | .119         | .056  | -.181      | .179 |
| $AIC = 35266.840; nBIC = 35474.734$                                                                      |              |       |            |      |

*Note.* Standardized solution from the constant change model. DV = dependent variable; C= conscientiousness; Gf = fluid intelligence;

C x Gf = latent interaction between conscientiousness and fluid intelligence; SES = socioeconomic status (composite measure); CFI = comparative fit index; RMSEA = root mean square error of approximation;

SRMR = standardized root mean squared residual; AIC = Akaike information criterion; nBIC = Bayesian information criterion corrected for sample size. Grades were corrected for school type and inverted for interpretability.

**Table S5***Latent change models predicting baseline level and change of grades (German)*

|                                                                                                           | DV: Baseline |       | DV: Change |      |
|-----------------------------------------------------------------------------------------------------------|--------------|-------|------------|------|
|                                                                                                           | $\beta$      | $p$   | $\beta$    | $p$  |
| Baseline model                                                                                            |              |       |            |      |
| C                                                                                                         | .188         | .002  | .158       | .258 |
| Gf                                                                                                        | -.391        | <.001 | -.200      | .186 |
| (Sex)                                                                                                     | .254         | <.001 | .133       | .231 |
| (SES)                                                                                                     | .282         | <.001 | -.270      | .060 |
| $X^2(48 = 92.473, p < .001; CFI = .969, RMSEA = .030; SRMR = .038$<br>$AIC = 35013.914; nBIC = 35211.908$ |              |       |            |      |
| Latent interaction model                                                                                  |              |       |            |      |
| C                                                                                                         | .191         | .002  | .160       | .241 |
| Gf                                                                                                        | .400         | <.001 | -.209      | .169 |
| C x Gf                                                                                                    | .088         | .181  | -.082      | .539 |
| (Sex)                                                                                                     | .252         | <.001 | .135       | .222 |
| (SES)                                                                                                     | .276         | <.001 | -.265      | .064 |
| $AIC = 35016.273; nBIC = 35224.167$                                                                       |              |       |            |      |

*Note.* Standardized solution from the constant change model. DV = dependent variable; C= conscientiousness; Gf = fluid intelligence;

C x Gf = latent interaction between conscientiousness and fluid intelligence; SES = socioeconomic status (composite measure); CFI = comparative fit index; RMSEA = root mean square error of approximation;

SRMR = standardized root mean squared residual; AIC = Akaike information criterion; nBIC = Bayesian information criterion corrected for sample size. Grades were corrected for school type and inverted for interpretability.
